# Supplementary material for: Synthesis of Mixed Ligand Ruthenium (II/III) Complexes and Their Antibacterial Evaluation on Drug-Resistant Bacterial Organisms
Source: Hindawi journal article supplement (doi:10.1155/2020/2150419), 2020-03-19
Supplement: f1 [file 2150419.f1.pdf]

## Supplementary Information

# Synthesis of mixed ligand ruthenium (II/III) complexes and their antibacterial evaluation on drug resistant bacterial organisms

James T.P. Matshwele,<sup>1</sup> Florence Nareetsile,<sup>2</sup> Daphne Mapolelo,<sup>2</sup> Pearl Matshameko,<sup>3</sup> David O. Nkwe,<sup>4</sup> Melvin Leteane<sup>3</sup>, Sebusi Odisitse,<sup>1</sup>

<sup>1</sup>Botswana International University of Science and Technology, Department of Chemistry and Forensic Sciences, Private Bag 16, Palapye, Botswana.

<sup>2</sup>University of Botswana, Department of Chemistry, Private Bag 0704, Gaborone, Botswana.

<sup>3</sup>University of Botswana, Faculty of Science, Department of Biological Sciences, Gaborone, Botswana, Private Bag 0704, Gaborone, Botswana.

<sup>4</sup>Botswana International University of Science and Technology, Department of Biological Sciences and Biotechnology, Private Bag 16, Palapye, Botswana.

Corresponding author: Sebusi Odisitse; [odisites@biust.ac.bw](mailto:odisites@biust.ac.bw)

## Table of Contents

|    |                                                                                   |   |
|----|-----------------------------------------------------------------------------------|---|
| 1. | 4-butoxy-N,N-bis(pyridin-2-ylmethyl)aniline (BUT) 1 Supplementary material .....  | 2 |
| 2. | Li[Ru(Cl) <sub>4</sub> (DPA)] 2 Supplementary material.....                       | 4 |
| 3. | [Ru(BUT)(DMF)(DPA)](BH <sub>4</sub> ) <sub>2</sub> 3 Supplementary material ..... | 6 |
| 4. | [Ru(BUT)(Cl) <sub>3</sub> ] 4 Supplementary material .....                        | 8 |

### 1. 4-butoxy-N,N-bis(pyridin-2-ylmethyl)aniline (BUT) 1 Supplementary Material

Yield: 0.15 g, 72.4%. mp 145-147°C. IR(cm<sup>-1</sup>) (C-H) 2959.5, (C=C) 1510.4, (Ar-N) 1433.0, (C-O) 123.5. <sup>1</sup>H NMR (600 MHz, CDCl<sub>3</sub>, δ) 8.55 (m, 2H), 7.59 (m, 2H), 7.31 (m, 2H), 7.13 (m, 2H), 6.67 (dd, J = 91.8, 8.8 Hz, 4H), 4.39 (s, 4H), 3.85 (t, J = 6.6 Hz, 2H), 1.72 – 1.67 (q, 2H), 1.43 (m, 2H), 0.93 (t, J = 7.4 Hz, 3H). HRESI-MS [M+Na]<sup>+</sup> m/z 370.2362 (calcd for C<sub>22</sub>H<sub>25</sub>N<sub>3</sub>ONa 370.4518).

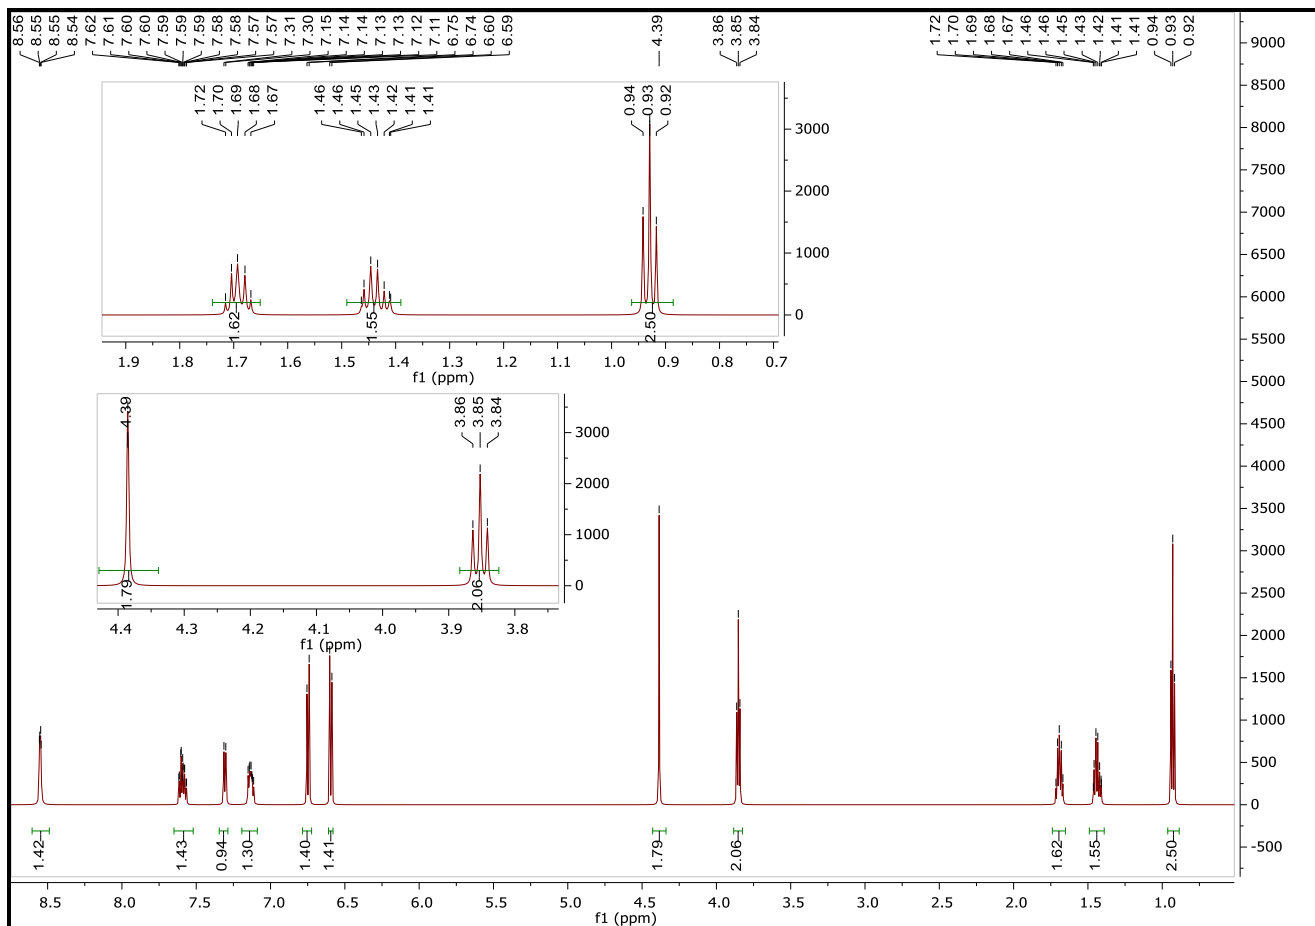

Figure 1: Proton NMR spectrum of BUT 1

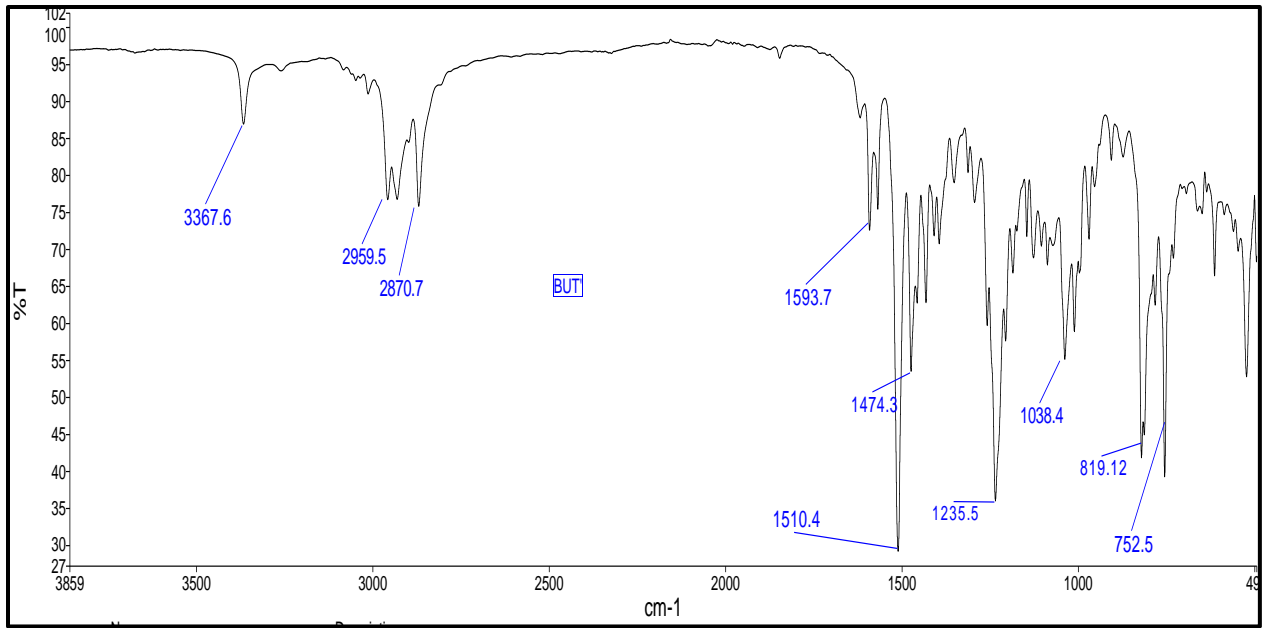

Figure 2: FTIR spectrum of BUT 1

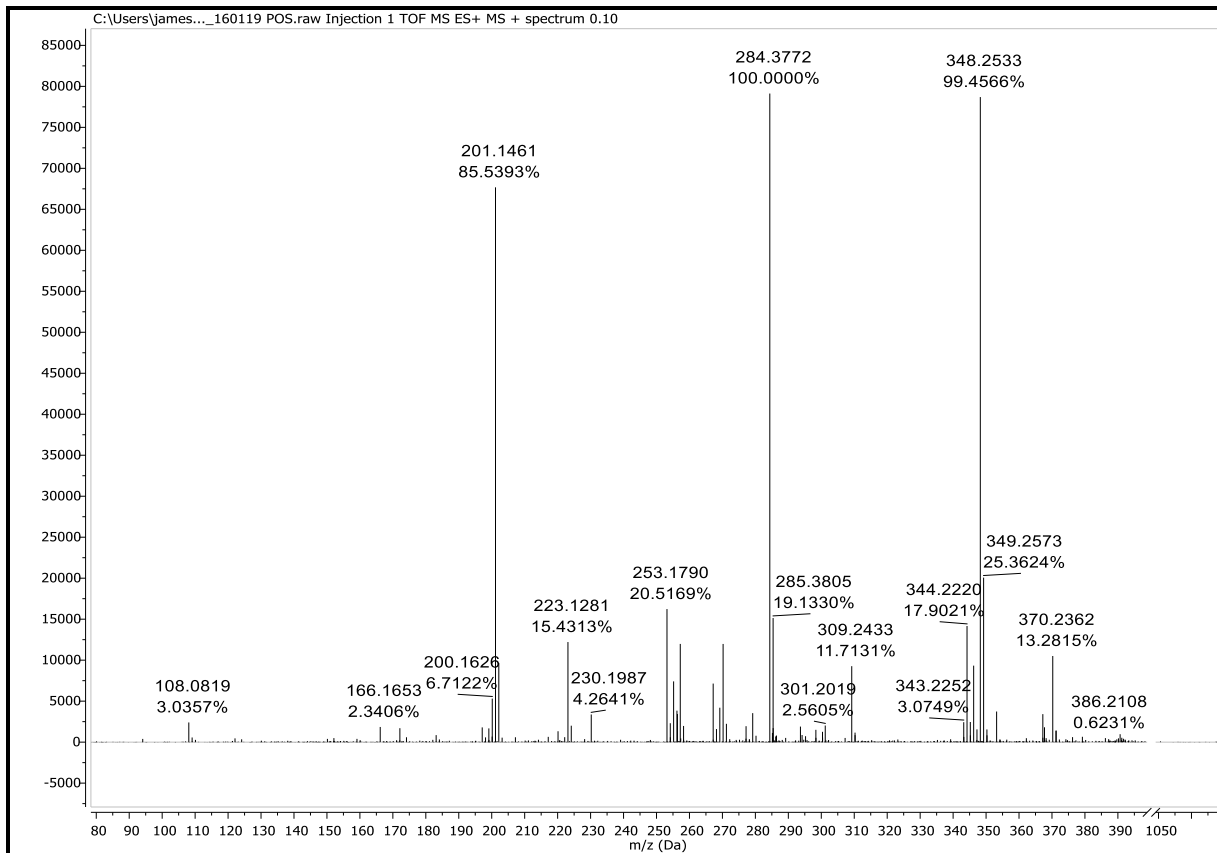

Figure 3: HRESI-MS spectrum of BUT 1

## 2. Li[Ru(Cl)<sub>4</sub>(DPA)] 2 Supplementary Material

Yield: 1.58 g, 78.3%. IR ( $\nu_{\max}$  / $\text{cm}^{-1}$ ) (C-H) 3135.0, (C=C) 1534.0, (C-O) 1244.8, (Ar-N) 1431.2, (N-H) 3287.1-3499.0. UV-Vis (DMF;  $\lambda_{\max}$  [nm]): 309, 373, 578. HRESI-MS [M+OH]  $m/z$  439.3237 (calcd for  $\text{C}_{10}\text{H}_{10}\text{Cl}_4\text{LiN}_3\text{ORu}$  438.0157).

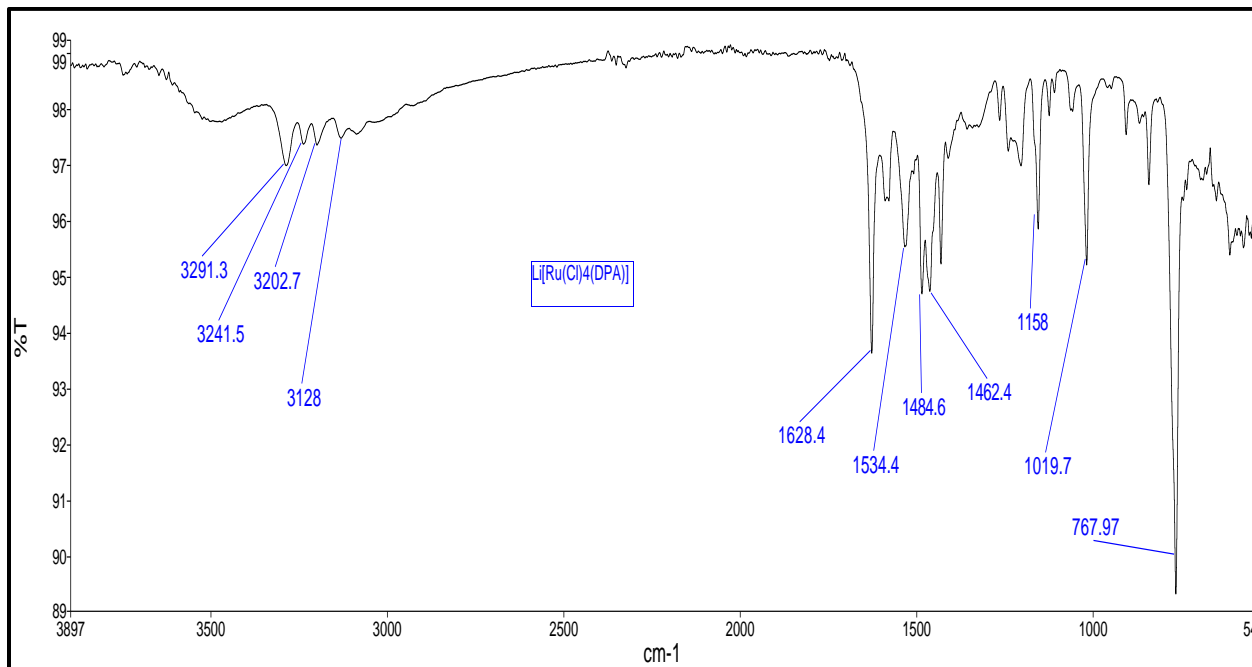

Figure 4: FTIR Spectrum of complex 2

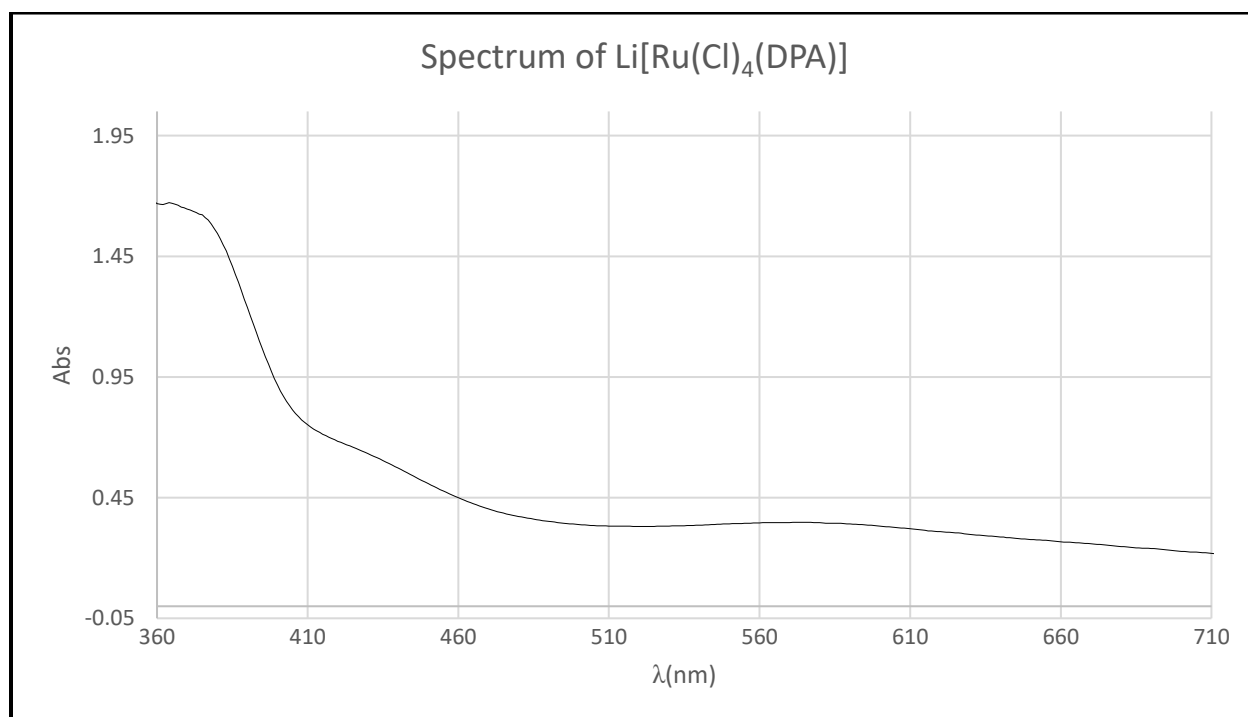

Figure 5: UV/Vis Spectrum of Complex 1

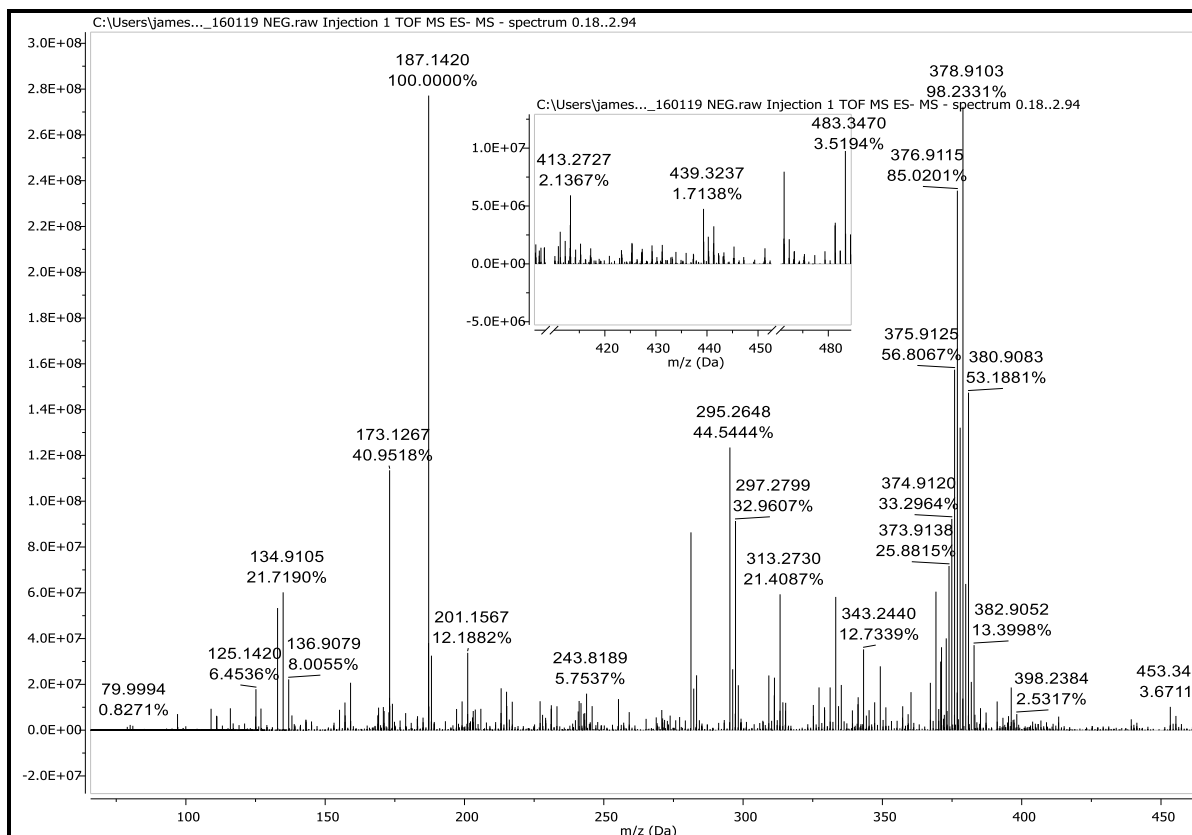

Figure 6: HRESI-MS spectrum of complex 2

### 3. [Ru(BUT)(DMF)(DPA)](BH<sub>4</sub>)<sub>2</sub> 3 Supplementary Material

Yield: 0.140 g, 48.9%. IR ( $\nu_{\max}$  /cm<sup>-1</sup>) (C-H) 2930.0, (C=C) 1504.0, (C-O) 1244.8, (Ar-N) 1434.2, (N-H) 3369.3, (C=O<sub>DMF</sub>) 1950.1. UV-Vis (DMF;  $\lambda_{\max}$  [nm]): 297, 382, 596. HRESI-MS [M+NH<sub>4</sub>] m/z 741.2516 (calcd for C<sub>35</sub>H<sub>53</sub>B<sub>2</sub>N<sub>8</sub>O<sub>2</sub>Ru<sup>2+</sup> 741.3188).

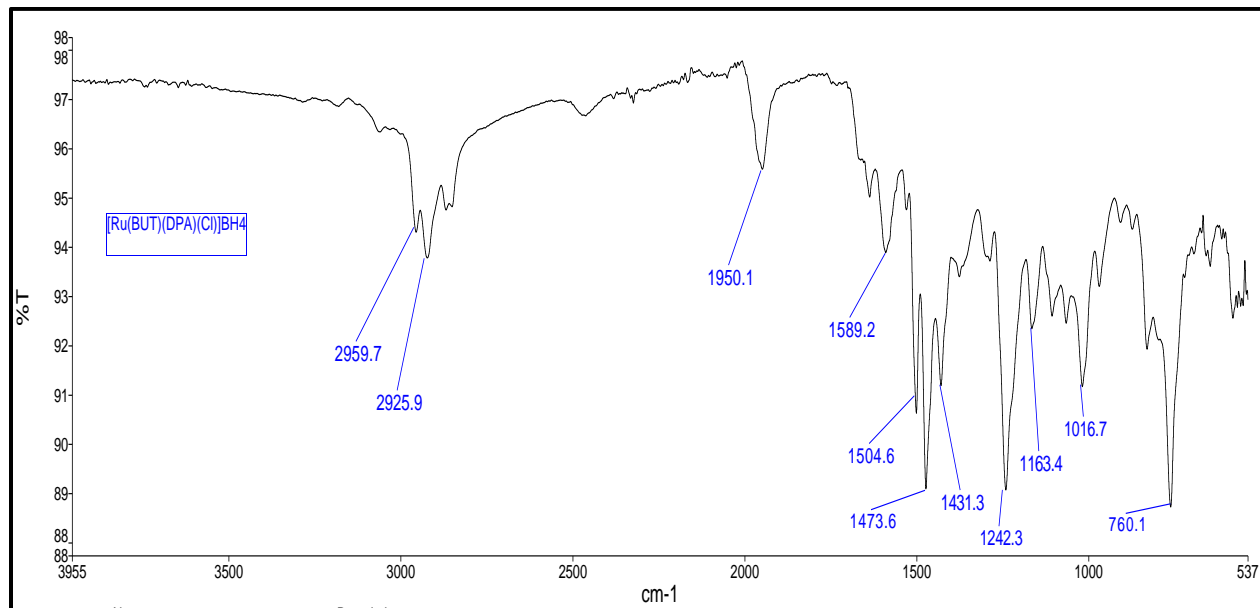

Figure 7: FTIR Spectrum of complex 3

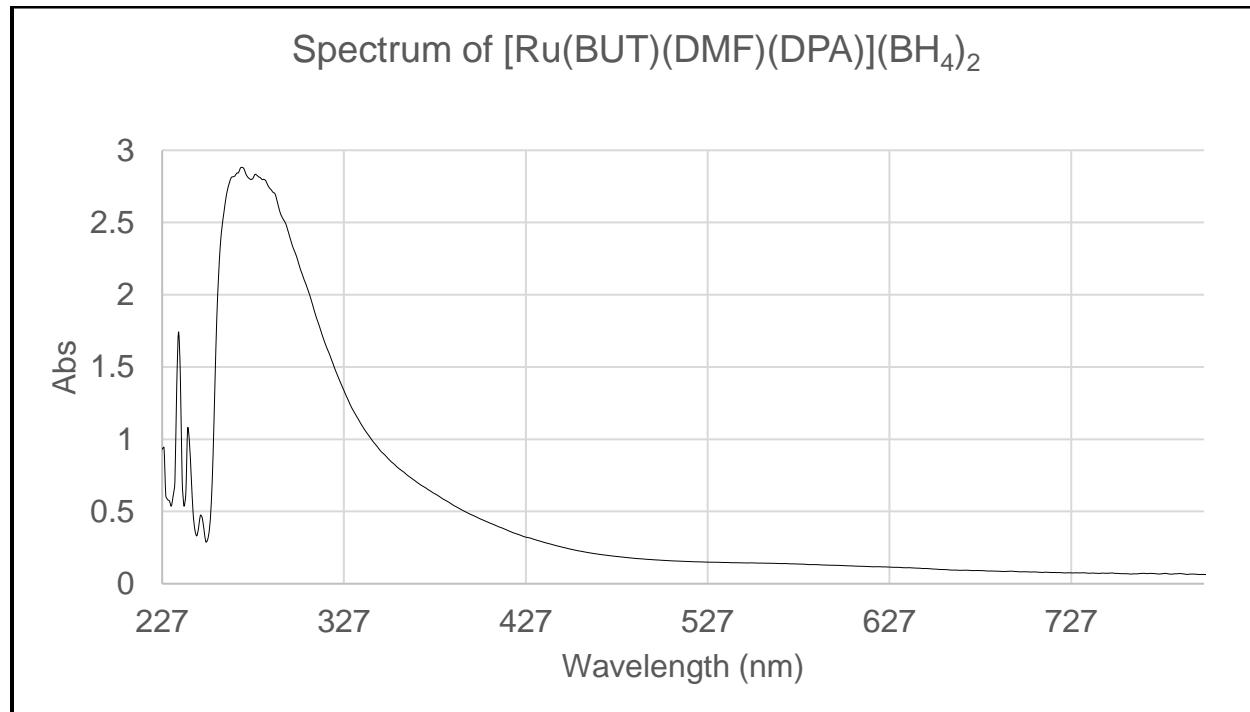

Figure 8: UV/Vis Spectrum of complex 3

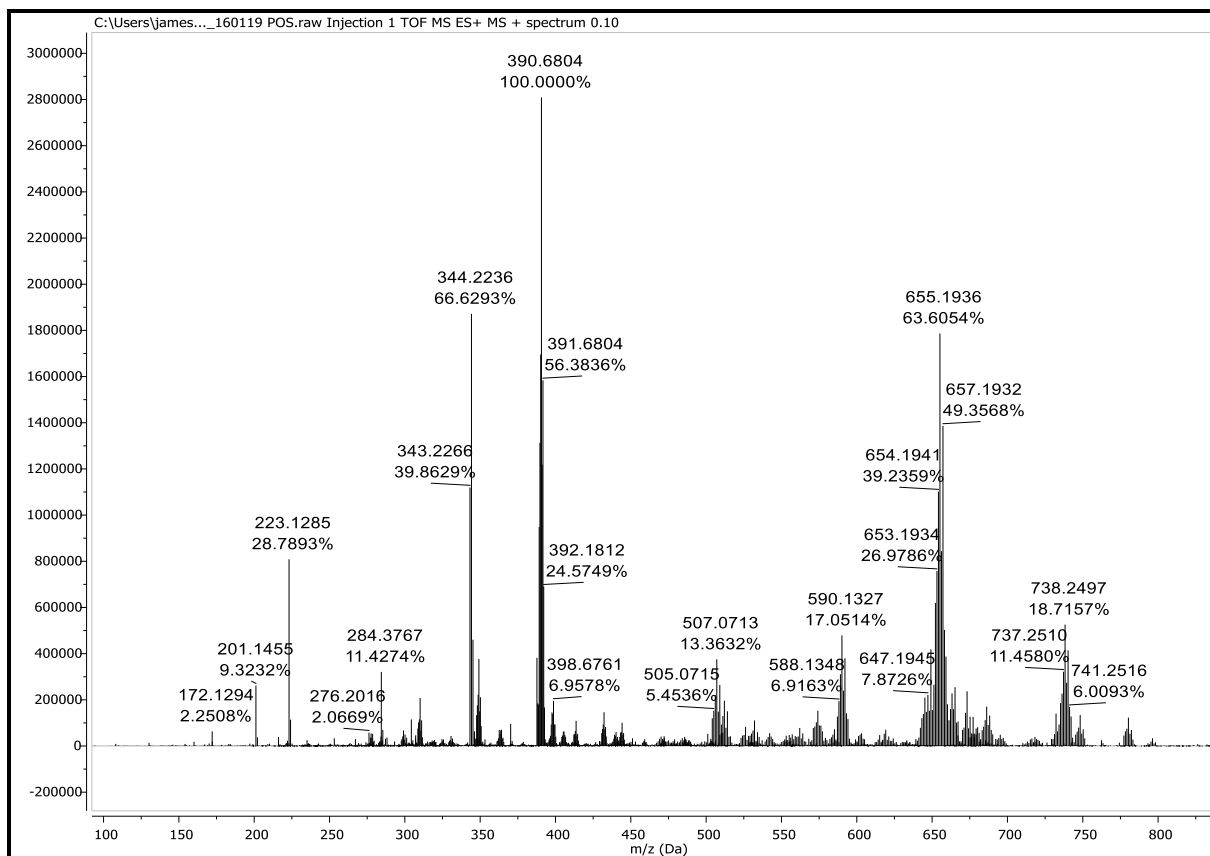

Figure 9: HRESI-MS spectrum of complex 3

#### 4. [Ru(BUT)(Cl)<sub>3</sub>] 4 Supplementary Material

Yield: 1.9 g, 72.0 %. IR ( $\nu_{\max}$  / $\text{cm}^{-1}$ ) (C-H) 2958.7, (C=C) 1503.8, (C-O) 1249.3, (Ar-N) 1438.3. UV-Vis (DMF;  $\lambda_{\max}$  [nm]): 271, 380, 596. HRESI-MS [M+K]  $m/z$  593.1459 (calcd for  $\text{C}_{22}\text{H}_{25}\text{Cl}_3\text{N}_3\text{OKRu}$  593.0107)

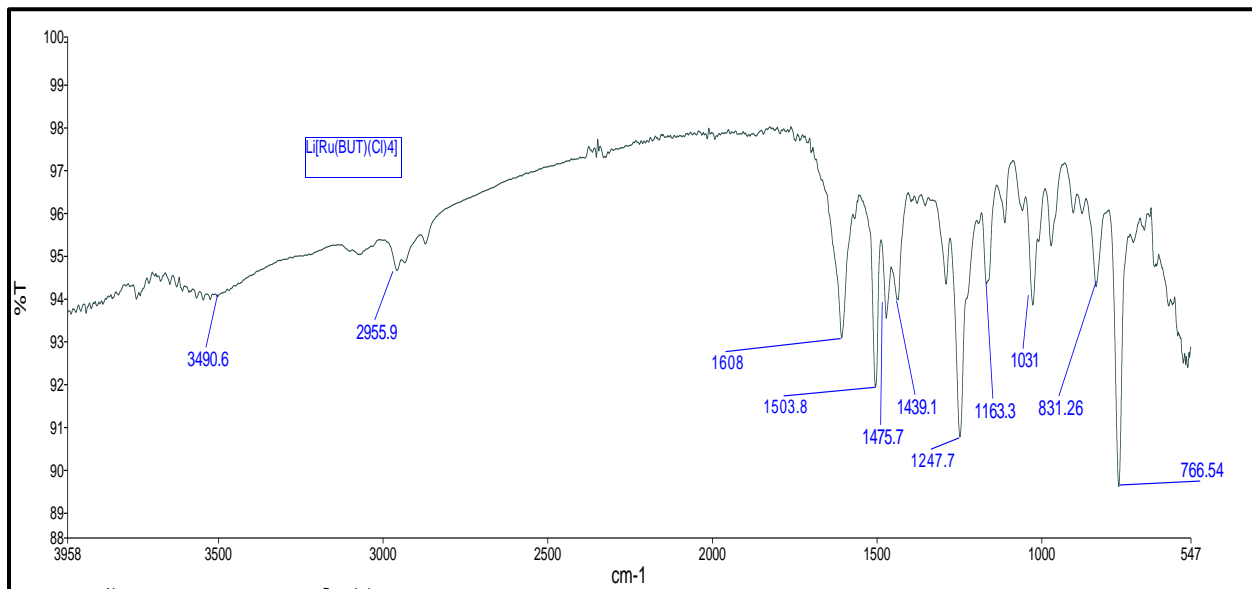

Figure 10: FTIR Spectrum of complex 4

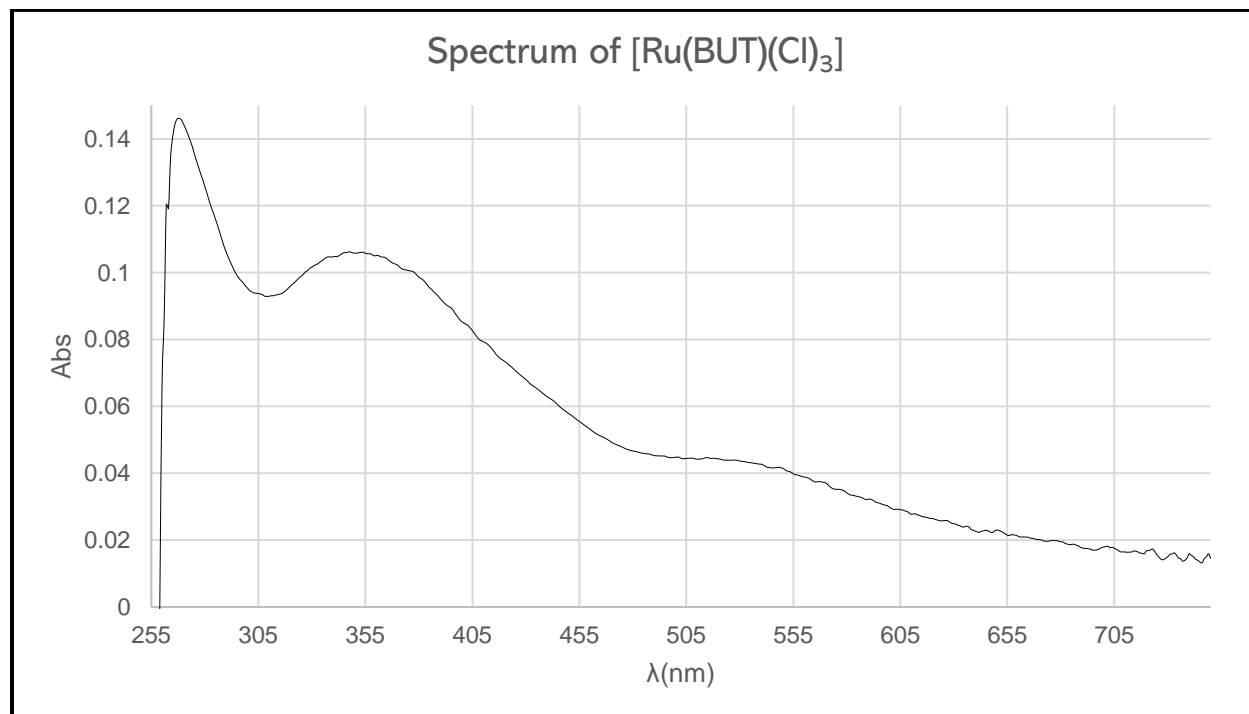

Figure 11: UV/Vis Spectrum of complex 4



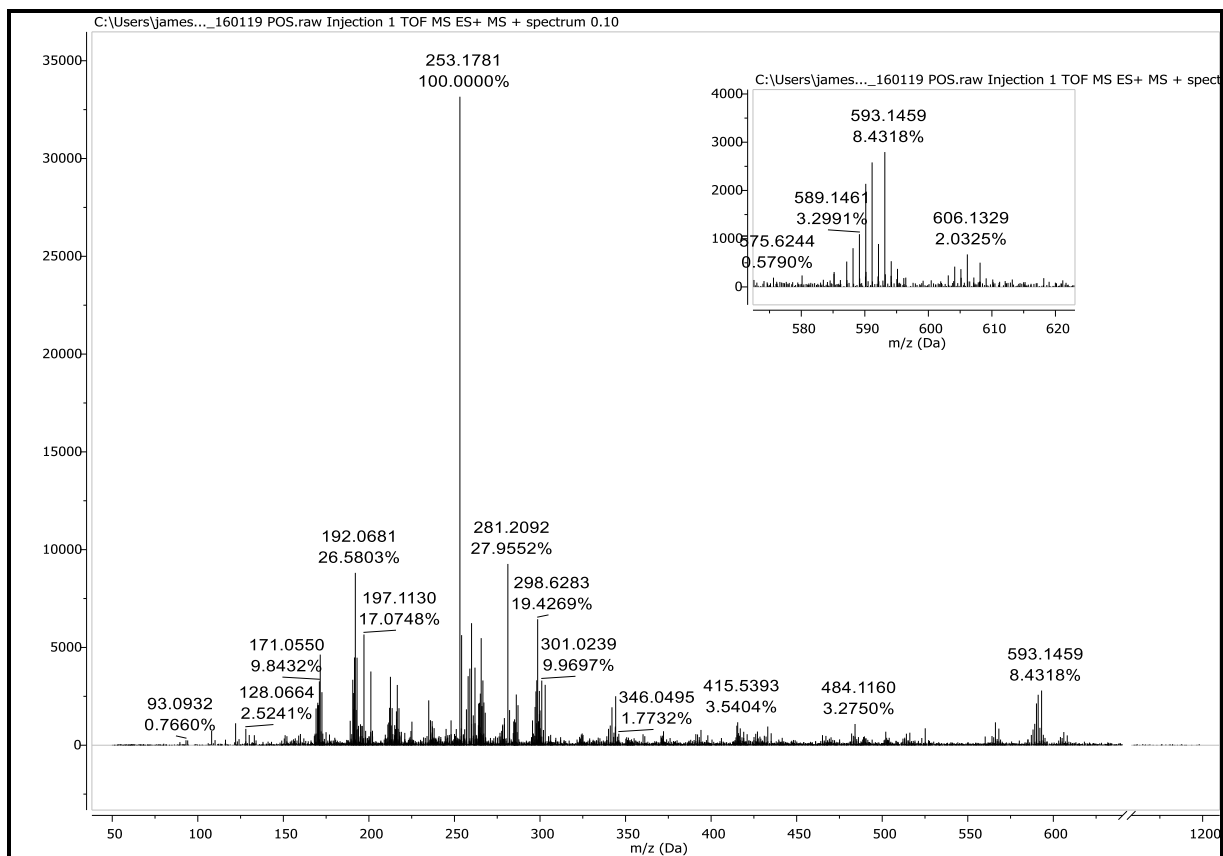

Figure 12: HRESI-MS spectrum of complex 4
